# Supplementary material for: Facile fabrication of highly-stretchable, low-hysteresis and notch-insensitive ionogels for strain sensors
Source: Royal Society of Chemistry journal article supplement (doi:10.1039/d4tc00514g), 2024-01-01
Supplement: d4tc00514g1.pdf [file d4tc00514g1.pdf]

1 **Supporting Information**

2

3 **Facile Fabrication of Highly-Stretchable, Low-**  
4 **Hysteresis and Notch-Insensitive Ionogels for**  
5 **Strain Sensors**

6 *Yufei Wang<sup>b,1</sup>, Xiaohui Yu<sup>b,\*</sup>, Qiaozhi Hou<sup>a</sup>, and Xiaoshan Fan<sup>a,\*</sup>*

7 <sup>a</sup> School of Medicine, Huanghe Science and Technology University, Zhengzhou 450061, P. R.  
8 China

9 <sup>b</sup> State Key Laboratory for Modification of Chemical Fibers and Polymer Materials, College of  
10 Materials Science and Engineering, Innovation Center for Textile Science and Technology,  
11 Donghua University, Shanghai 201620, P. R. China

12

13 \* Corresponding Author

14 \*E-mail: xhyu@mail.dhu.edu.cn (X. Yu)

15 \*E-mail: xsfan@dhu.edu.cn (X. Fan)

16

17

---

## 1 EXPERIMENTAL METHODS

2 **Characterization.** Microscope photography was conducted using an Olympus BX-53M  
3 instrument, and subsequent image analysis was performed with Image J. Fourier transform  
4 infrared (FT-IR) spectra were acquired employing a Nicolet 670 spectrometer equipped with  
5 an attenuated total reflectance accessory. Thermal gravimetric analysis (TGA) was executed  
6 using a TG 209 F1 under an N<sub>2</sub> atmosphere, ramping from room temperature to 600 °C at a  
7 heating rate of 10 °C min<sup>-1</sup>. The electrical conductivity of the ionic conductive elastomer was  
8 assessed through a four-point probe resistivity test using the 4-Point probe resistivity  
9 measurement system (RTS-8).

10 The mechanical properties of the samples were assessed using an electronic universal  
11 testing machine (SUNS UTM2000) at room temperature. Tensile measurements involved  
12 stretching strip-shaped ionogel samples (100 × 10 × 1 mm<sup>3</sup>) at a strain rate of 50 mm min<sup>-1</sup>.  
13 Rheological measurements were conducted employing an advanced rotary rheometer (Anton  
14 Paar, MCR302, Austria) at room temperature. The investigation was conducted over a range  
15 of angular frequencies ( $\omega$ ) from 0.1 to 100 rad s<sup>-1</sup> while maintaining a constant oscillatory  
16 strain of 1%. Additionally, the temperature-dependent rheological characteristics were  
17 examined from 5 to 100 °C, with a heating-cooling rate of 10 °C min<sup>-1</sup>. These measurements  
18 were performed at fixed angular frequency and oscillatory strain values of 10 rad s<sup>-1</sup> and 1%.  
19 The dynamic mechanical behavior of the DMCI samples was also studied at various  
20 temperatures, employing angular frequencies ranging from 0.1 to 100 rad s<sup>-1</sup> and a fixed  
21 oscillatory strain of 1%.

22 Dissipated energy ( $\Delta U$ ) for DMCI was calculated as:

$$23 \quad \Delta U = \int_{loading} \sigma d\varepsilon - \int_{unloading} \sigma d\varepsilon$$

24 Loss coefficient ( $\eta$ ) of the DMCI was evaluated as:

$$25 \quad \eta = \frac{\Delta U}{U} \times 100\%$$

26 **Fabrication and characterization of the DMCI-based sensor.** The DMCI-based sensor was  
27 constructed using a strip-type ionogel (100 × 10 × 1 mm<sup>3</sup>) affixed with two pieces of copper  
28 foil (each measuring 10 × 5 mm<sup>2</sup>) at both ends of the ionogel, functioning as collectors.  
29 Simultaneously, copper wires were connected to the copper foil to establish the link between  
30 the sensor and the source meter. Sensing performance was evaluated through the  
31 collaboration of a universal testing machine and the source meter (Keithley, 2612B). The  
32 relative resistance changes and gauge factor (GF) of the sensor were calculated using the  
33 following formulas:

$$34 \quad \Delta R/R_0 (\%) = \frac{R - R_0}{R_0} \times 100\%$$

35 where  $R_0$  and  $R$  were the resistance without strain and the real-time resistance under the  
36 stretch, respectively.

$$37 \quad GF = \frac{R - R_0}{R_0} / \varepsilon$$

---

1 where  $\varepsilon$  was the applied strain.

2

3

1

2

3

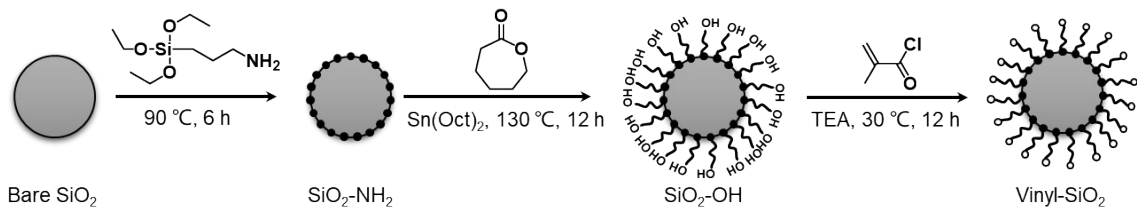

4

5

**Scheme S1.** Synthesis of surface vinyl modified silica Vinyl-SiO<sub>2</sub>.

6

1  
2  
3

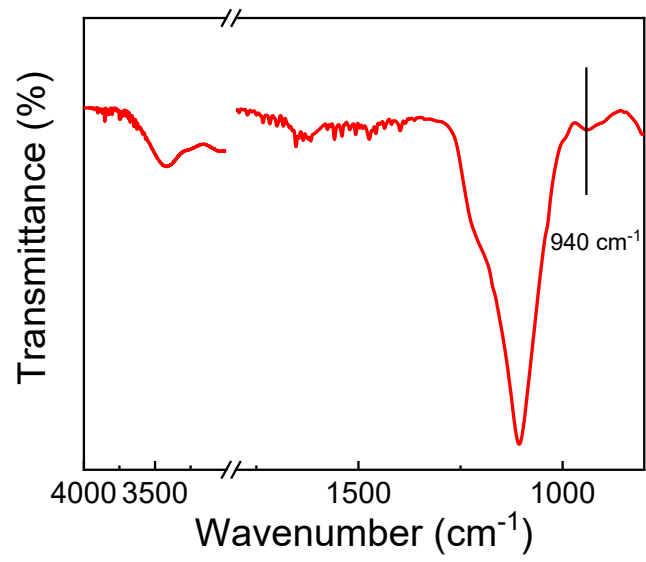

4  
5  
6

**Fig. S1** FT-IR spectra of Vinyl-SiO<sub>2</sub>.

1  
2  
3  
4

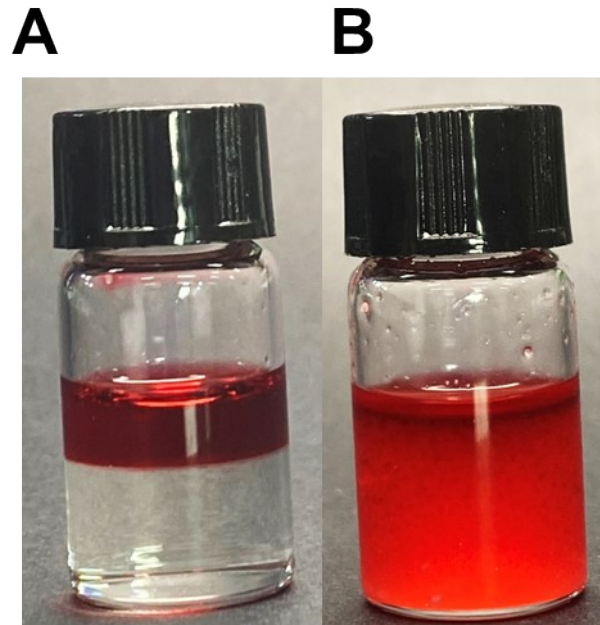

5  
6  
7  
8

**Fig. S2** Digital photos of the **(A)** layered mixture and the **(B)** pickering emulsion.

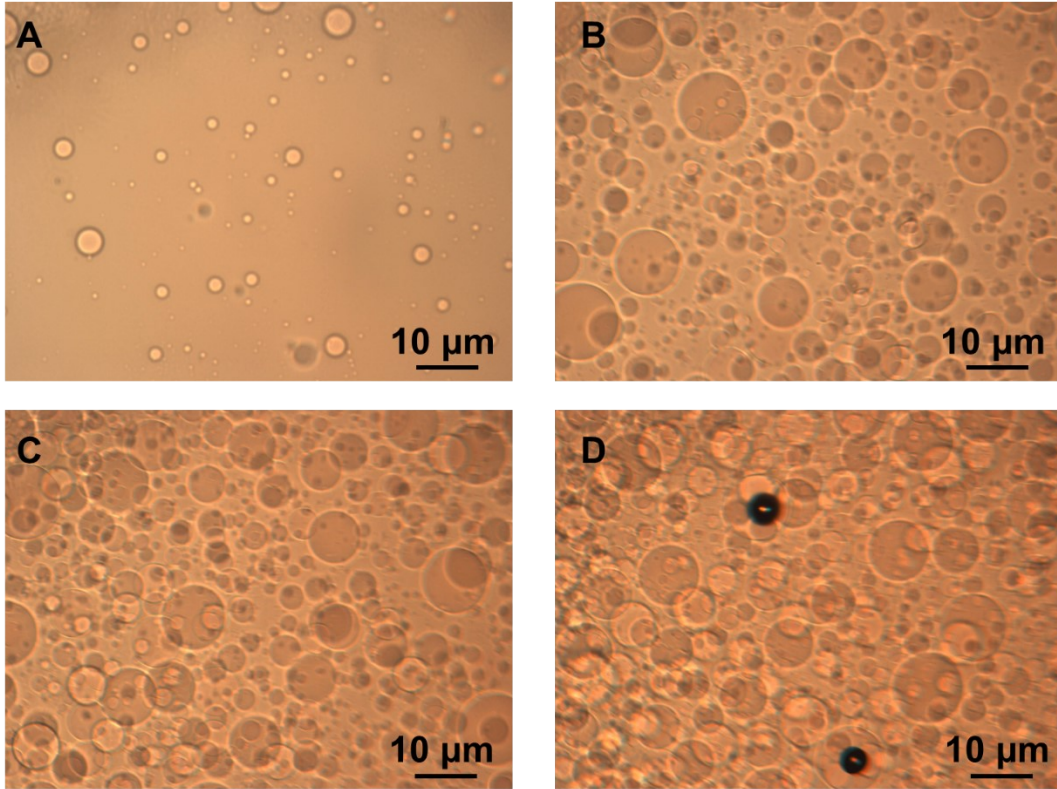

1  
2  
3  
4

**Fig. S3** Optical micrographs of Pickering emulsions with **(A)** DMCI-0%, **(B)** DMCI-1%, **(C)** DMCI-2% and **(D)** DMCI-3% after 30 minutes.

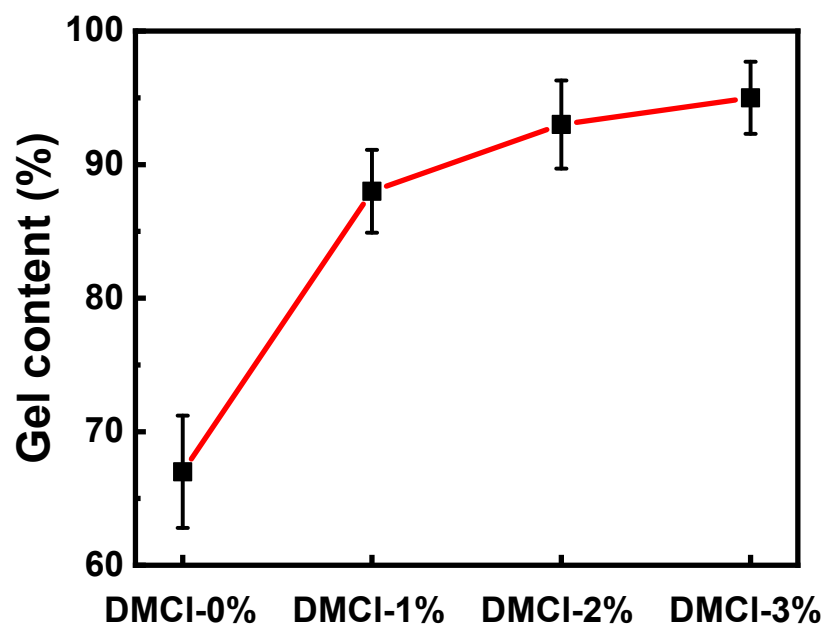

1  
2  
3

**Fig. S4** The gel contents of the polymer networks with different Vinyl-SiO<sub>2</sub> contents.
